# Supplementary material for: Identification of the Role of TGR5 in the Regulation of Leydig Cell Homeostasis
Source: MDPI journal article supplement (doi:10.3390/ijms232315398), 2022-12-06
Supplement: s1 [file s1]

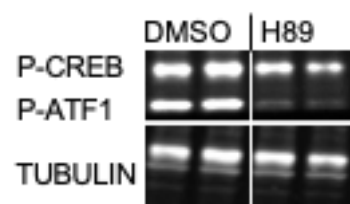

**Figure S1.** Representative western blots of P-CREB and TUBULIN in mLTC1 cells treated with vehicle (DMSO) or H89 for 2 hours.
